# Supplementary material for: Suboptimal Concentrations of Ceftazidime/Avibactam (CAZ-AVI) May Select for CAZ-AVI Resistance in Extensively Drug-Resistant Pseudomonas aeruginosa: In Vivo and In Vitro Evidence
Source: MDPI journal article supplement (doi:10.3390/antibiotics11111456), 2022-10-22
Supplement: s1 [file s1]

**Figure S1. Bland-Altman plot of observed and predicted ceftazidime concentrations for the four regimens in the overall experiments: C<sub>ss</sub> of 12 mg/L, C<sub>ss</sub> of 18 mg/L, C<sub>ss</sub> of 30 mg/L and C<sub>ss</sub> of 48mg/L. C<sub>ss</sub>, steady-state concentrations; SD, standard deviations.**

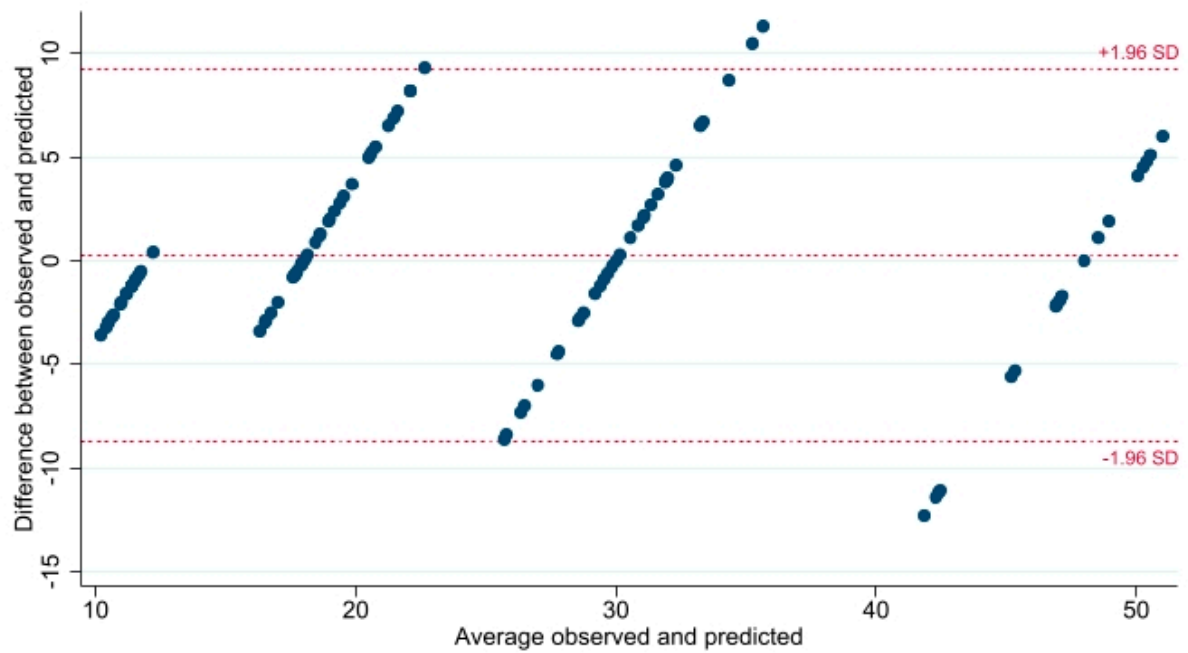

**Table S1. Mean bacterial density (log<sub>10</sub> CFU/mL) during 7-day HFIM assays and the emergence of CAZ-AVI resistant subpopulation onto agar supplemented with CAZ-AVI at 2X, 4X and 8X baseline MIC. CFU, colony forming unit; HFIM, hollow fiber infection model; CAZ/AVI, ceftazidime/avibactam; MIC, minimum inhibitory concentration; C<sub>ss</sub>, steady-state concentrations. Data are presented as the mean concentration ± standard deviation.**

|                                                  | 0 h              | 8 h              | 24 h             | 48 h             | 72 h             | 96 h             | 144 h             | 168 h             |
|--------------------------------------------------|------------------|------------------|------------------|------------------|------------------|------------------|-------------------|-------------------|
| <b>Control</b>                                   | <b>7.08±0.05</b> | <b>9.27±0.81</b> | <b>9.30±0.36</b> | <b>9.83±0.92</b> | <b>9.57±0.04</b> | <b>9.85±0.21</b> | <b>10.26±0.12</b> | <b>10.08±0.03</b> |
| 2XMIC Drug Plates CAZ/AVI                        | 0.00             | 0.00             | 0.00             | 0.00             | 0.00             | 0.00             | 0.00              | 0.00              |
| 4XMIC Drug Plates CAZ/AVI                        | 0.00             | 0.00             | 0.00             | 0.00             | 0.00             | 0.00             | 0.00              | 0.00              |
| 8XMIC Drug Plates CAZ/AVI                        | 0.00             | 0.00             | 0.00             | 0.00             | 0.00             | 0.00             | 0.00              | 0.00              |
| <b>CAZ/AVI CI C<sub>ss</sub> 12 mg/L (2XMIC)</b> | <b>7.08±0.05</b> | <b>9.11±0.31</b> | <b>7.65±0.88</b> | <b>9.70±0.09</b> | <b>9.60±0.24</b> | <b>7.48±0.15</b> | <b>7.81±0.06</b>  | <b>8.65±0.52</b>  |
| 2XMIC Drug Plates CAZ/AVI                        | 0.00             | 0.00             | 2.40±0.05        | 4.70±0.2         | 4.70±0.08        | 4.70±0.12        | 4.70±0.3          | 4.70±0.03         |
| 4XMIC Drug Plates CAZ/AVI                        | 0.00             | 0.00             | 1.30±0.2         | 4.70±0.18        | 4.70±0.03        | 4.70±0.12        | 4.70±0.18         | 4.70±0.4          |
| 8XMIC Drug Plates CAZ/AVI                        | 0.00             | 0.00             | 0.00             | 1.00±0.16        | 3.48±0.03        | 4.70±0.21        | 4.70±0.35         | 4.70±0.12         |
| <b>CAZ/AVI CI C<sub>ss</sub> 18 mg/L (3XMIC)</b> | <b>7.08±0.05</b> | <b>7.84±0.57</b> | <b>6.71±0.23</b> | <b>7.00±0.00</b> | <b>6.02±0.40</b> | <b>6.20±0.28</b> | <b>7.44±0.06</b>  | <b>8.18±0.57</b>  |
| 2XMIC Drug Plates CAZ/AVI                        | 0.00             | 0.00             | 0.00             | 1.70±0.24        | 4.70±0.15        | 4.70±0.03        | 4.70±0.4          | 4.70±0.14         |
| 4XMIC Drug Plates CAZ/AVI                        | 0.00             | 0.00             | 0.00             | 0.00             | 3.48±0.2         | 4.70±0.31        | 4.70±0.26         | 4.70±0.10         |
| 8XMIC Drug Plates CAZ/AVI                        | 0.00             | 0.00             | 0.00             | 0.00             | 0.00             | 4.70±0.05        | 4.70±0.12         | 4.70±0.28         |
| <b>CAZ/AVI CI C<sub>ss</sub> 30 mg/L (5XMIC)</b> | <b>7.08±0.05</b> | <b>6.93±0.21</b> | <b>5.25±0.42</b> | <b>5.33±0.21</b> | <b>3.78±0.17</b> | <b>3.88±0.41</b> | <b>3.48±0.37</b>  | <b>2.92±0.11</b>  |
| 2XMIC Drug Plates CAZ/AVI                        | 0.00             | 0.00             | 0.00             | 0.00             | 0.00             | 0.00             | 0.00              | 0.00              |
| 4XMIC Drug Plates CAZ/AVI                        | 0.00             | 0.00             | 0.00             | 0.00             | 0.00             | 0.00             | 0.00              | 0.00              |
| 8XMIC Drug Plates CAZ/AVI                        | 0.00             | 0.00             | 0.00             | 0.00             | 0.00             | 0.00             | 0.00              | 0.00              |
| <b>CAZ/AVI CI C<sub>ss</sub> 48 mg/L (8XMIC)</b> | <b>7.08±0.05</b> | <b>6.40±0.25</b> | <b>5.24±0.02</b> | <b>4.54±0.35</b> | <b>4.04±0.32</b> | <b>4.35±0.12</b> | <b>3.30±0.61</b>  | <b>2.60±0.28</b>  |
| 2XMIC Drug Plates CAZ/AVI                        | 0.00             | 0.00             | 0.00             | 0.00             | 0.00             | 0.00             | 0.00              | 0.00              |
| 4XMIC Drug Plates CAZ/AVI                        | 0.00             | 0.00             | 0.00             | 0.00             | 0.00             | 0.00             | 0.00              | 0.00              |
| 8XMIC Drug Plates CAZ/AVI                        | 0.00             | 0.00             | 0.00             | 0.00             | 0.00             | 0.00             | 0.00              | 0.00              |
